# Supplementary material for: Criterion validity and reliability of an instrumented mouthguard under pendulum impactor conditions
Source: Springer Nature journal article supplement (doi:10.1007/s12283-023-00434-4), 2023-09-07
Supplement: MOESM1 [file 12283_2023_434_MOESM1_ESM.pdf]

## Online Supplementary Materials

### Online Resources 1 – CHAMP Checklist

Table 1 details the checklist items from the consensus head acceleration measurement practices (CHAMP) consensus [1].

TABLE 1. CHAMP 2022 checklist of information to include when reporting laboratory validation studies of head acceleration measurement devices.

| Checklist Item                                              | Explanation                                                                                                                                              | Example(s)                                                                                                                                                                                                                                                                                 | Reported on Page No |
|-------------------------------------------------------------|----------------------------------------------------------------------------------------------------------------------------------------------------------|--------------------------------------------------------------------------------------------------------------------------------------------------------------------------------------------------------------------------------------------------------------------------------------------|---------------------|
| <b>1. Sensor Technology and Specifications</b>              |                                                                                                                                                          |                                                                                                                                                                                                                                                                                            |                     |
| (1a) Device model name                                      |                                                                                                                                                          | PMID: 33051745, "The Cue, GForceTracker, and Shockbox sensors were mounted directly inside the helmet."                                                                                                                                                                                    | 5                   |
| (1b) Sensor type                                            | The name or model of device used to collect data<br>The type of sensor (e.g., triaxial linear accelerometer, triaxial ARS)                               | PMID: 26268586, "The X2 system has a 3-axis linear accelerometer and a 3-axis angular rate sensor..."                                                                                                                                                                                      | 5                   |
| (1d) Sensor sample rate                                     | The sampling rate of the sensor                                                                                                                          | PMID: 32975553, "The sensor records 62 ms of data at 1000 Hz..."                                                                                                                                                                                                                           | 5                   |
| (1e) Sensor magnitude range                                 | The range of magnitudes the sensor can record                                                                                                            | PMID: 23604848, "Mouthguard sensing is accomplished via a triaxial accelerometer (ADXL377, Analog Devices, Inc., Norwood, MA, USA) with 200 g maximum per axis and a triaxial angular rate gyroscope (L3G4200D, ST Microelectronics, Geneva, Switzerland) with 40 rad/s maximum per axis." | 5                   |
| (1f) If applicable, device hardware/firmware version number | The version number related to the hardware/firmware for the device                                                                                       | PMID: 29613824, "Hardware and firmware were fully up to date according to the manufacturers at the time of testing [xPatch: Hardware updated Oct 2014, Software and firmware updated Aug 2017; SIM-G: Hardware updated Jun 2014, Software and firmware updated Aug 2017]"                  | 5                   |
| (1g) Recording trigger threshold                            | The sensing threshold (e.g., 10 g) for an event to be recorded on the head acceleration measurement device and how the trigger threshold is evaluated    | PMID: 23891566, "The helmet recorded ...if the impact exceeded 10 g."                                                                                                                                                                                                                      | 5                   |
| (1h) Pre-trigger duration                                   | Duration of pre-trigger data recorded                                                                                                                    | PMID: 32975553, "...10 ms before and 52 ms after linear acceleration exceeds the threshold."                                                                                                                                                                                               | 5                   |
| (1i) Post-trigger duration                                  | Duration of post-trigger data recorded                                                                                                                   | PMID: 32975553, "...10 ms before and 52 ms after linear acceleration exceeds the threshold."                                                                                                                                                                                               | 5                   |
| (1j) Device form factor and attachment                      | The type of device/how the device is mounted (e.g., mouthguard)                                                                                          | PMID: 30802147, "MV1 (MVTrak) is a sensor system designed for custom-molded placement in the left external ear canal to optimize coupling to the head."                                                                                                                                    | 5                   |
| <b>2. Surrogate Selection</b>                               |                                                                                                                                                          |                                                                                                                                                                                                                                                                                            |                     |
| (2a) Surrogate used                                         | The surrogate used (e.g., non-biofidelic [by intent] test device, anthropometric test device (ATD), post-mortem human subjects (PMHS), human volunteers) | PMID: 23846161, "A Hybrid III (HIII) 50th percentile male ATD head and neck with the 3-22-2 accelerometer array was rigidly mounted at T1."                                                                                                                                                | 4/5                 |

|                                                                             |                                                                                                                                                               |                                                                                                                                                                                                                         |                                    |
|-----------------------------------------------------------------------------|---------------------------------------------------------------------------------------------------------------------------------------------------------------|-------------------------------------------------------------------------------------------------------------------------------------------------------------------------------------------------------------------------|------------------------------------|
| (2b) Inertial properties of surrogate                                       | Geometry and mass—including what reference population is intended to be represented by this surrogate                                                         | PMID: 27155744, "This ATD had the inertial properties of a 50th percentile male head."                                                                                                                                  | ___4/Online<br>Materials___        |
| (2c) If applicable, modifications made to standard surrogates               | Any modifications made to standard surrogates for this study                                                                                                  | PMID: 34263384, "Modifications to the NOCSAE headform include a mouth cut-out for mounting dentitions and a Hybrid-III neck adapter to replace the standard rigid neck and allow 6DOF head motion."                     | ___4/5/<br>Online<br>Materials ___ |
| (2d) If applicable, corresponding neckform and/ or other body segments used | The neckform used to simulate head-neck response (e.g., Hybrid III neck, THOR neck) and/or other body segments (e.g., torso) used to simulate the system mass | PMID: 21994068, "... mounted to a standard HIII neck was used to replicate the response of a football player's head. Per manufacturer's specification, the cable in the HIII neck was tensioned to 1.1 Nm (10 in-lb.)." | ___4/ Online<br>Materials<br>_____ |
| (2e) Modifications made to standard neckforms, if applicable                | Any modifications made to standard neckforms for this particular study                                                                                        | PMID: 33000448, "...the lower neck mount of the Hybrid III dummy was modified to incorporate a spherical ball joint that allowed for lateral flexion and twist of the neck."                                            | ___NA___                           |

---

1

| Checklist Item                                                  | Explanation                                                                                                                                                            | Example(s)                                                                                                                                                                                                                                                                                                                                                                                                                                                                                                                                                                                                                                                                                                             | Reported on Page No           |
|-----------------------------------------------------------------|------------------------------------------------------------------------------------------------------------------------------------------------------------------------|------------------------------------------------------------------------------------------------------------------------------------------------------------------------------------------------------------------------------------------------------------------------------------------------------------------------------------------------------------------------------------------------------------------------------------------------------------------------------------------------------------------------------------------------------------------------------------------------------------------------------------------------------------------------------------------------------------------------|-------------------------------|
| (2f) Validation of the surrogate                                | Evidence that the surrogate has been shown to produce a validated response for the chosen application                                                                  | PMID: 29613824, "These reference sensors have been found to exhibit high fidelity (ref) and were considered to quantify the true head kinematics of the headform during impact."                                                                                                                                                                                                                                                                                                                                                                                                                                                                                                                                       | 5                             |
| (2g) Mounting of the device on the surrogate                    | Details on how the device is mounted on the surrogate and the biofidelity of that mounting                                                                             | PMID: 29383374, "The dental model was rigidly attached to the ATD headform in the place of the upper dentition, and the instrumented mouthpiece was mounted on the dental model, with the lower jaw firmly clamped to the mouthguard simulating jaw clenching..."                                                                                                                                                                                                                                                                                                                                                                                                                                                      | 4/<br>Online<br>Materials     |
| (2h) Factors related to coupling of the device to the surrogate | Specific parameters that could influence coupling of the device to the surrogate (e.g., helmet fit, skin/hair surrogate, use of nylon skull cap, sweat, jaw mechanics) | PMID: 23891566, "The helmet was fit by inflating the Z-pad bladders until they contacted the head."                                                                                                                                                                                                                                                                                                                                                                                                                                                                                                                                                                                                                    | 4/<br>Online<br>Materials     |
| <b>3. Test Conditions</b>                                       |                                                                                                                                                                        |                                                                                                                                                                                                                                                                                                                                                                                                                                                                                                                                                                                                                                                                                                                        |                               |
| (3a) Test device                                                | The device used in testing (linear impactor, pendulum, drop tower)                                                                                                     | PMID: 21451177, "The helmet was impacted using a pneumatic linear impactor."                                                                                                                                                                                                                                                                                                                                                                                                                                                                                                                                                                                                                                           | 4/5                           |
| (3b) Impactor surface and mass                                  | The type and material of the impact interface (elastomer padding, use of anvils, etc.). Provide the mass and its relevance to desired test conditions                  | PMID: 24920257, "The impactor mass was 14 kg and was padded with a 36 mm thick, 127 mm diameter vinyl nitrile pad (Impax VN 600, DerTex Corp, Saco, ME) without the standard hard plastic cap. This configuration generated an impact amplitude and duration similar to that observed during helmet-to-helmet impacts."                                                                                                                                                                                                                                                                                                                                                                                                | 4                             |
| (3c) Surrogate orientation and mounting, if applicable          | How the surrogate was placed in the test device                                                                                                                        | PMID: 24920257, "Both headforms were mounted on a 50th percentile male Hybrid III neck mounted to a table free to slide horizontally parallel to the impactor's axis."                                                                                                                                                                                                                                                                                                                                                                                                                                                                                                                                                 | 4/<br>Online<br>Materials     |
| (3d) Impact velocity                                            | The velocities used in testing and their relevance to desired test conditions                                                                                          | PMID: 32989591, "Regarding the impact velocities used for the testing, three of the used velocities (5.5, 7.4, and 9.3 m/s) are based on the National Football League (NFL) helmet test protocol, and an additional lower velocity (3.6 m/s) was added to analyze impacts of lower intensity as well."                                                                                                                                                                                                                                                                                                                                                                                                                 | 4                             |
| (3e) Impact duration                                            | The duration(s) used in testing and their relevance to desired test conditions                                                                                         | PMID: 29613824, "The helmeted tests yielded average impact durations of 10.7 (1.3) milliseconds. The padded impactor to bare head condition was performed with a vinyl-nitrile foam impactor face measuring 127 mm in diameter and 40 mm thick. These tests yielded average impact durations of 12.5 (1.3) milliseconds and were chosen to provide similar impacts to the helmeted condition without the effect of the helmet. The rigid impactor to bare head condition was performed with the same flat, rigid, nylon impactor face from the helmeted tests to be representative of impact magnitudes and durations seen in unhelmeted impacts. These impacts yielded average durations of 3.6 (0.25) milliseconds." | 4/5/9/<br>Online<br>Materials |

|                      |                                                                                       |                                                                                                                                                                                                                                                                                                           |           |
|----------------------|---------------------------------------------------------------------------------------|-----------------------------------------------------------------------------------------------------------------------------------------------------------------------------------------------------------------------------------------------------------------------------------------------------------|-----------|
| (3f) Impact location | The impact location(s) used in testing and their relevance to desired test conditions | PMID: 29613824, "Impacts were performed to the front, front boss, rear boss, and rear locations of the headform at targeted linear acceleration magnitudes of 25, 50, 75, and 100 g. Impact locations were equally spaced around the head and chosen because of their variability in direction of force." | ___4/5___ |
|----------------------|---------------------------------------------------------------------------------------|-----------------------------------------------------------------------------------------------------------------------------------------------------------------------------------------------------------------------------------------------------------------------------------------------------------|-----------|

2

| Checklist Item                                            | Explanation                                                                                                                                                          | Example(s)                                                                                                                                                                                                                                                                                                                                                                                                              | Reported on Page No |
|-----------------------------------------------------------|----------------------------------------------------------------------------------------------------------------------------------------------------------------------|-------------------------------------------------------------------------------------------------------------------------------------------------------------------------------------------------------------------------------------------------------------------------------------------------------------------------------------------------------------------------------------------------------------------------|---------------------|
| (3g) Impact direction                                     | The direction(s) of impact used in testing and their relevance to desired test conditions                                                                            | PMID: 26268586, "Ten impacts were nominally centroidal, i.e., the impactor's axis passed near a vertical axis through the headform's COG."<br>PMID: 26268586, "The front-oblique test condition was intended to represent a centric impact (head CG path eccentricity = 65 mm) and the rear eccentric test condition was intended as a more eccentric impact (head CG path eccentricity = 101 mm)."                     | _____               |
| (3h) Number of trials                                     | The number of trials performed for each of the test conditions                                                                                                       | PMID: 17597937, "Three drops were performed at each location."                                                                                                                                                                                                                                                                                                                                                          | ___4___             |
| (3i) If applicable, helmet manufacturer/model name        | The name of the manufacturer/model of the helmet used in impact testing                                                                                              | PMID: 29613824, A large Riddell Speed (Riddell, Elyria, OH) football helmet without the facemask was worn by the headform throughout helmeted tests                                                                                                                                                                                                                                                                     | ___N/A___           |
| (3j) Repeatability and reproducibility of test conditions | Methods used to evaluate the repeatability and reproducibility of the test conditions and surrogate                                                                  | PMID: 24920257, "Repeatability was assessed using the COV, which equals the ratio of the standard deviation (SD) to the mean, expressed as a percentage. Repeatability was categorized as excellent (COV ≤ 3%), acceptable (3 < COV ≤ 7%), marginal (7 < COV ≤ 10%) and poor (COV > 10%). The COVs for PLA and PAA were calculated for each series of five repeated tests for all eight impact conditions in each lab." | ___Not Tested___    |
| 4. Reference Sensor Measurement                           |                                                                                                                                                                      |                                                                                                                                                                                                                                                                                                                                                                                                                         | ___5___             |
| (4a) Reference sensor type and model                      | The type of sensor or measurement device used as a reference (triaxial accelerometer, nineaccelerometer package, high-speed video), including the sensor part number | PMID: 26268586, "...a 3-2-2-2 array of linear accelerometers (Endevco 7264B-2000 g, San Juan Capistrano, CA)"                                                                                                                                                                                                                                                                                                           | ___5___             |
| (4b) Reference sensor mounting                            | The method and location for reference sensor mounting                                                                                                                | PMID: 26268586, "...a 3-2-2-2 array of linear accelerometers (Endevco 7264B-2000 g, San Juan Capistrano, CA) installed in a compact cluster (rx = ry = 34 mm, rz = 27 mm) in a modified load-sensing headform (MLSH) based on the 50th percentile male Hybrid III headform."                                                                                                                                            | ___5___             |
| (4c) Reference sensor sampling rate                       | The sampling rate of the reference sensor                                                                                                                            | PMID: 26268586, "...modified load-sensing headform (MLSH) based on the 50th percentile male Hybrid III headform. Accelerometer data were acquired at 10 kHz with hardware anti-aliasing filters prior to digitization (SAE Channel Class 1000)."                                                                                                                                                                        | ___5___             |
| (4d) Reference sensor magnitude range                     | The range of magnitudes the reference sensor can record                                                                                                              |                                                                                                                                                                                                                                                                                                                                                                                                                         | ___5___             |

|                                                                |                                                           |                                                                                                                                                                  |
|----------------------------------------------------------------|-----------------------------------------------------------|------------------------------------------------------------------------------------------------------------------------------------------------------------------|
| (4e) Reference sensor filtering                                | Filtering methods used for the reference measurements     | PMID: 29613824, "The reference data were filtered at ___5___ CFC 1000 for linear acceleration and CFC 155 for rotational velocity."                              |
| (4f) Time syncing of reference sensor to head kinematic device | Method for syncing reference data to wearable device data | PMID: 31297724, "Mouthpiece and reference traces were time-aligned such that the first data point that crossed the 5 g trigger threshold was set to time t = 0." |

3

| Checklist Item                                                           | Explanation                                                                                                                                                                                                                                                                                                               | Example(s)                                                                                                                                                                                                                                                                                                                                                                                                                                                                                                                                                                                                                                                                                                                                                                                                                                                                                                                                                       | Reported on Page No                |
|--------------------------------------------------------------------------|---------------------------------------------------------------------------------------------------------------------------------------------------------------------------------------------------------------------------------------------------------------------------------------------------------------------------|------------------------------------------------------------------------------------------------------------------------------------------------------------------------------------------------------------------------------------------------------------------------------------------------------------------------------------------------------------------------------------------------------------------------------------------------------------------------------------------------------------------------------------------------------------------------------------------------------------------------------------------------------------------------------------------------------------------------------------------------------------------------------------------------------------------------------------------------------------------------------------------------------------------------------------------------------------------|------------------------------------|
| 5. Advanced Post-prMethods used to transform recorded data to analyzable |                                                                                                                                                                                                                                                                                                                           |                                                                                                                                                                                                                                                                                                                                                                                                                                                                                                                                                                                                                                                                                                                                                                                                                                                                                                                                                                  | ___5/6/                            |
| (5a) Data transformation                                                 | data (e.g., numerical integration from angular velocity to angular acceleration, transformation from the location of the sensor to the center of gravity of the head, if transformation used, specify measurements defining the location to which data is transformed, must disclose if a "black box" algorithm was used) | PMID: 31122140, "The acceleration data are transformed to calculate linear acceleration at the centre of gravity of the head. Rotational acceleration is calculated from rotational velocity using five-point differentiation. Both the transformation and differentiation were carried using the software supplied by X2Biosystems."<br>PMID: 34263384, "Kinematics measured by the mouthpiece were transformed to a local head coordinate system using a rigid body transformation based on the geometry of each headform. Detailed 3D surface scans of both headforms with the IM affixed to the upper dentition were obtained to determine the location and orientation of the sensing elements in relation to the head CG (Artec Eva, Artec 3D, Santa Clara, CA). Reference measurements at the maxilla and device measurements from the electronics board inside the head of the MLSH were transformed to the head CG based on detailed computer drawings" | Online Materials<br>___            |
| (5b) Kinematic data filtering                                            | Any filtering used for processing data collected from a wearable device; must disclose if manufacturer "black box" post-processing was used. Include offset removal                                                                                                                                                       | PMID: 29383374, "Raw signals were low-pass filtered according to Society of Automotive Engineers protocols. The mouthpiece data used threshold frequencies of 300 Hz and 110 Hz for linear acceleration and angular velocity, respectively, with 110 Hz being the bandwidth limit for the gyroscope."<br>PMID: 30802147, "Raw data are uploaded to the MVTrak server before being processed by the producer's algorithm."                                                                                                                                                                                                                                                                                                                                                                                                                                                                                                                                        | ___5/6/<br>Online Materials<br>___ |
| (5c) Other post-processing techniques                                    | Any software or hardware used for processing data collected from a wearable device (e.g., impact detection filtering, infrared system); must disclose if manufacturer "black box" post-processing was used. Provide details on validation of post-processing techniques (e.g., training data set used)                    | <a href="https://doi.org/10.1177/1754337117739458">https://doi.org/10.1177/1754337117739458</a> , "...data were processed using proprietary algorithms from which the resultant peak linear acceleration (PLA) and peak angular acceleration (PAA) impact magnitude measures were output."                                                                                                                                                                                                                                                                                                                                                                                                                                                                                                                                                                                                                                                                       | ___5/6/<br>Online Materials<br>___ |
| (5d) Event removal                                                       | Clear, objective methods for sensor event removal, if any sensor events are removed from analysis                                                                                                                                                                                                                         | PMID: 32975553, "A positive single axis maximum of 28.9 rad/s and negative single axis absolute maximum of 29.1 rad/s were determined. One trial was removed from analysis because this maximum angular velocity measurement was sustained for more than five consecutive data points."                                                                                                                                                                                                                                                                                                                                                                                                                                                                                                                                                                                                                                                                          | ___NA___                           |

4

| Checklist Item                                                                                                    | Explanation                                                                                                                                                      | Example(s)                                                                                                                                                                                                                                                                                                                                                                                                                             | Reported on Page No         |
|-------------------------------------------------------------------------------------------------------------------|------------------------------------------------------------------------------------------------------------------------------------------------------------------|----------------------------------------------------------------------------------------------------------------------------------------------------------------------------------------------------------------------------------------------------------------------------------------------------------------------------------------------------------------------------------------------------------------------------------------|-----------------------------|
| 6. Analytical Methods and Data (6a) Validation metrics, including equations used to derive metrics, if applicable | Description of each primary and secondary validation metric (e.g., impact counts, peak linear acceleration, change in angular velocity)                          | PMID: 32975553, "Key event characteristics include peak angular velocity (i.e., maximum velocity during event), rise time (i.e., time for angular velocity to reach peak velocity from event start at velocity surpassing 5% of peak), fall time (i.e., time from peak velocity to 5% of the peak), and a proxy for average angular acceleration (i.e., approximated by taking the ratio of peak angular velocity and the rise time)." | 6/7/<br>Online<br>Materials |
| (6b) Statistical and analytical methods for comparison                                                            | The statistical and analytical methods used to compare the wearable device data to the reference measures (e.g., recall, RMS error, general linear mixed models) | PMID: 31297724, "Average resultant peak percent error was used to determine agreement between reference data and the mouthpiece data. Normalized root-meansquare error (NRMS) was used to determine agreement over the entire impact duration recorded by the mouthpiece (60 ms)."                                                                                                                                                     | 6/7/<br>Online<br>Materials |

## 6 Online Resources 2 – Expanded Methodology

### 7 Section 2.1 Headform Characteristics

8 A National Operating Committee on Standards for Athletic Equipment (NOCSAE)  
 9 bareheaded headform, [2] was impacted. The headform was modified with a Hybrid III neck  
 10 adapter to allow for 6 degrees of freedom head movement, and a mouth cut out to fit a  
 11 detachable three-dimensional printed mould. To accommodate the mouth cut off, a portion  
 12 of the rubber from the nose to the middle of the chin was removed and replaced with a 3D  
 13 printed mandible based on the size and shape of the class 1 Ideal Arch used in Hybrid III  
 14 mandible modification [2]. The mandible was oriented at an 8-degree occlusal plan angle  
 15 and placed in an anatomically correction position within the headform. The hybrid III neck  
 16 was mounted per manufacturers specifications. To ensure the iMG stayed in place  
 17 throughout an impact, and to mimic teeth clamping used by on field players, an aluminium  
 18 plate was inserted into the space between the iMG and the lower jaw of the headform. This  
 19 palte was then screwed upwards to ensure there was no gap between the plate and the  
 20 mouthguard.

### 21 Section 2.2 Mouthguard Characteristics

22 The mouthguard utilised 1.5 mm Erkoflex material and 2 mm of ethylene vinyl acetate  
 23 (EVA). Sensors are placed on the back left (relative to the athlete) of the mouthguard,  
 24 situated on the outside gum. The mouthguard is CE and UKCA safety certified [3].

### 25 Section 2.3 Mouthguard Data Processing

26 Raw linear acceleration and rotational velocity data were downloaded from proprietary  
 27 software and exported to Matlab script (The Mathworks Inc, Natick, Massachusetts, USA) for  
 28 analysis. The orientation of accelerometer and gyroscope axes were then aligned with the  
 29 SAE-J211 plane utilised by the ATD. As the iMG coordinate system originates at the sensor,  
 30 axes required a further rotation using the rotation matrices:

$$31 \quad R_1 = \begin{bmatrix} 1 & 0 & 0 \\ 0 & \cos \alpha & -\sin \alpha \\ 0 & \sin \alpha & \cos \alpha \end{bmatrix}$$

$$32 \quad R_2 = \begin{bmatrix} \cos \beta & 0 & \sin \beta \\ 0 & 1 & 0 \\ -\sin \beta & 0 & \cos \beta \end{bmatrix}$$

$$33 \quad R_3 = \begin{bmatrix} \cos \theta & -\sin \theta & 0 \\ \sin \theta & \cos \theta & 0 \\ 0 & 0 & 1 \end{bmatrix}$$

$$34 \quad R_4 = \begin{bmatrix} \cos \mu & -\sin \mu & 0 \\ \sin \mu & \cos \mu & 0 \\ 0 & 0 & 1 \end{bmatrix}$$

38

39 The gyroscope was rotated using  $R_1$ ,  $R_2$ , and  $R_3$ , where  $R_1$  refers to rotation about the x axis  
40 ( $\alpha = -10$ ),  $R_2$  refers to rotation about the y axis ( $\beta = -10$ ), and  $R_3$  refers to rotation about the z  
41 axis ( $\theta = 15$ ). The linear accelerometer was rotated using  $R_4$ , where  $R_4$  refers to rotation about  
42 the z axis ( $\mu = 20$ ). Rotation angles were estimated via image analysis of sensor placement  
43 within the mouthguard and headform, and an iterative process to ascertain visual alignment  
44 of x, y and z linear acceleration and rotational velocity waveforms.

45 Impact duration was calculated for all trials utilising the ATD resultant linear acceleration.  
46 Impacts were assumed to be linearly elastic, with impact duration calculated as the time  
47 difference between peak impact acceleration and impact start, multiplied by 2. Impact start  
48 was determined as the first instance of the resultant linear acceleration time-series exceeding  
49 a threshold of the mean of pre-impact quiet acceleration period plus or minus five times the  
50 standard deviation of pre-impact quiet acceleration period [4].

51 Regarding PRV, whilst previous literature has advocated for the use of peak change in  
52 rotational velocity to offset for any initial velocity present[5], the current study assumes a  
53 starting rotational velocity of zero due to a static headform, and hence utilised raw rotational  
54 velocity outputs.

55 To establish situation specific cut off frequencies for iMG data, Fast Fourier transform (FFT)  
56 analysis was completed within Matlab R2022a (Signal Processing Toolbox; The Mathworks  
57 Inc, Natick, Massachusetts, USA) assessing the x, y, z and resultant components of linear  
58 acceleration, rotational velocity and rotational acceleration time-series data. Frequency data  
59 was observed only over the first 35 ms of impact to increase time resolution. Optimal cut off  
60 frequencies for condition and each impact magnitude were visually identified. To provide  
61 further time-resolution to the frequency analysis of signals, continuous wavelet  
62 transformations (CWT) were also completed within Matlab (Signal Processing Toolbox; The



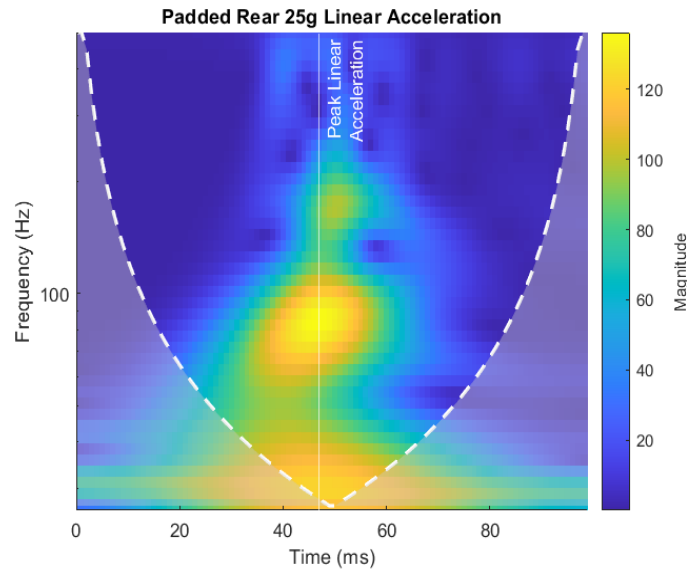

Figure 2. Example CWT output detailing signal frequency content and magnitude around point of impact.

63 Mathworks Inc, Natick, Massachusetts, USA), utilizing an analytic Morlet wavelet ('amor') to  
 64 elicit equal variance in both the time and frequency features. For CWT analysis, time-series  
 65 data were zero padded to ensure the impact point lay within the cone of influence and was  
 66 not subject to boundary effects. High magnitude frequency components around the time of  
 67 impact were interpreted as true signal, with noise elements either interpreted as time-  
 68 frequency clusters away from the assumed true-signal cluster, or not time aligned with the  
 69 point of impacts. An example trace is presented within Figure 2.

70 The authors acknowledge that individual analysis of impact frequency characteristics may not  
 71 be suitable for on field impacts, but due to the short time duration of 'rigid' impactor impacts  
 72 (which are not representative of on field impacts in sports such as rugby, boxing or football),  
 73 a singular cut off frequency is inappropriate to apply to all impacts. Previous versions of the  
 74 current mouthguard have utilised a cut off frequency of 160 Hz [6]. When this filter was  
 75 applied to the impacts in the current study, there was good agreement for all impacts within  
 76 the padded condition (all CCC's above 0.976; Table 2), however there was insufficient  
 77 agreement for PLA and PRA within the rigid condition, where the short duration of impacts  
 78 make such a low cut off frequency inappropriate (Table 2). As such, the current authors  
 79 advocate that the specific characteristics of impacts are accounted for when defining filter  
 80 characteristics.

81

82

83

84

**Table 2. Agreement statistics for padded (mean  $\pm$  SD impact duration  $12.01 \pm 1.35$  ms) and rigid (mean  $\pm$  SD impact duration  $4.06 \pm 0.59$  ms) impacts when a singular cut off frequency (160Hz) used for all impacts.**

|               |                                | CCC<br>(95% CI)      | ICC<br>(95% CI)      | Bland Altman (% Difference) |                |                |
|---------------|--------------------------------|----------------------|----------------------|-----------------------------|----------------|----------------|
|               |                                |                      |                      | Bias (95% CI)               | Lower<br>Limit | Upper<br>Limit |
| <b>Padded</b> | <b>PLA (g)</b>                 | 0.987<br>0.975-0.994 | 0.988<br>0.976-0.994 | 0.3%<br>(-4.93% - 4.33%)    | -15.01%        | 14.42%         |
|               | <b>PRV (rad/s)</b>             | 0.998<br>0.997-0.999 | 0.999<br>0.998-0.999 | 0.35%<br>(-0.67% - 1.36%)   | -2.88%         | 3.57%          |
|               | <b>PRA (rad/s<sup>2</sup>)</b> | 0.976<br>0.955-0.987 | 0.991<br>0.981-0.995 | 8.48%<br>(4.87% - 12.09%)   | -2.98%         | 19.94%         |
| <b>Rigid</b>  | <b>PLA (g)</b>                 | 0.651<br>0.515-0.756 | 0.874<br>0.758-0.936 | 28.68%<br>(23.13% - 34.24%) | 11.02%         | 46.34%         |
|               | <b>PRV (rad/s)</b>             | 0.994<br>0.989-0.997 | 0.995<br>0.989-0.997 | 0.05%<br>(-2.70% - 2.81%)   | -8.70%         | 8.81%          |
|               | <b>PRA (rad/s<sup>2</sup>)</b> | 0.596<br>0.461-0.704 | 0.850<br>0.715-0.924 | 41.60%<br>(36.77% - 46.43%) | 26.26%         | 59.94%         |

86 Online Resources 3 – Statistical Analysis Expansion

87 Agreement between measures was calculated using a battery of tests.

88 R-squared values indicates the proportionate amount of variation in the response variable y  
89 explained by the independent variables X in the linear regression model [7]. Although a  
90 commonly used method within iMG validation methodology [8, 9], correlation and linear  
91 regression model R squared value (interpreted in isolation) do not assess statistical  
92 agreement between measures and should not be utilised as a sole statistical test within such  
93 methodologies.

94 Intraclass correlation coefficients measure the reliability and validity of measurements for  
95 data that has been collected as groups [7]. For all variables, ICC's were calculated using the  
96 (3,1) convention[10], and were interpreted using the thresholds of >0.5 as poor, between 0.5  
97 and 0.75 as moderate, between 0.75 and 0.9 as good, and above 0.9 as excellent[11]. The CCC  
98 evaluates the degree to which pairs of observations fall on the 45° line through the origin [12];  
99 values for linear and rotational kinematic measures were calculated. The combined CCC value  
100 that accounts for peak linear and the highest rotational (velocity or acceleration) CCC value  
101 represented the overall iMG in-laboratory validity [13]. The minimum validity threshold value  
102 for both CCC and ICC values is considered 0.80 [13, 14].

103 Bland-Altman 95% limits of agreement analysis is a simple method to evaluate the mean  
104 difference between measurement systems, and to estimate an agreement interval within  
105 which 95% of the differences between methods falls [15]. Bland-Altman analysis was  
106 conducted using the “blandr” package [16] on RStudio (RStudio, Vienna, Austria).  
107 Differences were calculated weighing towards the ATD system, meaning positive bias  
108 indicated an underestimation in the iMG. Analyses were expressed using percentage  
109 difference, and plotted using custom RStudio script with absolute differences expressed in  
110 relation to the ATD reference. Although *a priori* 95% limits of agreement are usually  
111 required for Bland-Altman analysis [17], there is a lack of clinically informed criteria  
112 regarding what constitutes ‘agreement’ within head impact sensors.

113

114

115

- 116 1. Arbogast KB, Caccese JB, Buckley TA, et al (2022) Consensus Head Acceleration  
117 Measurement Practices (CHAMP): origins, methods, transparency and disclosure. *Ann*  
118 *Biomed Eng* 1–29
- 119 2. Pike J (2011) Development of an Articulating Mandible Headform Having Force  
120 Sensing Temporomandibular Joints
- 121 3. Gov.uk (2022) Using the UKCA marking. In: Retrieved 24/07/2023 from  
122 <https://www.gov.uk/guidance/using-the-ukca-marking>
- 123 4. Lake JP, Mundy PD, Comfort P, et al (2018) The effect of barbell load on vertical  
124 jump landing force-time characteristics. *J Strength Cond Res* 1.  
125 <https://doi.org/10.1519/jsc.0000000000002554>
- 126 5. Kieffer EE, Vaillancourt C, Brolinson PG, Rowson S (2020) Using in-mouth sensors  
127 to measure head kinematics in rugby. In: IRCOBI conference. pp 846–858
- 128 6. Jones C, Brown R (2022) VALIDATION OF AN INSTRUMENTED  
129 MOUTHGUARD. medRxiv
- 130 7. Field A (2013) *Discovering statistics using IBM SPSS statistics*. sage
- 131 8. Bartsch A, Samorezov S, Benzel E, et al (2014) Validation of an “intelligent  
132 Mouthguard” Single Event Head Impact Dosimeter. *SAE Technical Papers* 2014-  
133 Novem: <https://doi.org/10.4271/2014-22-0001>
- 134 9. Bartsch AJ, Hedin DS, Gibson PL, et al (2019) Laboratory and on-field data collected  
135 by a head impact monitoring mouthguard. In: 2019 41st Annual International  
136 Conference of the IEEE Engineering in Medicine and Biology Society (EMBC). IEEE,  
137 pp 2068–2072
- 138 10. Shrout PE, Fleiss JL (1979) Intraclass correlations: uses in assessing rater reliability.  
139 *Psychol Bull* 86:420
- 140 11. Koo TK, Li MY (2016) A guideline of selecting and reporting intraclass correlation  
141 coefficients for reliability research. *J Chiropr Med* 15:155–163
- 142 12. Lawrence I, Lin K (1989) A concordance correlation coefficient to evaluate  
143 reproducibility. *Biometrics* 255–268
- 144 13. Kieffer EE, Begonia MT, Tyson AM, Rowson S (2020) A Two-Phased Approach to  
145 Quantifying Head Impact Sensor Accuracy: In-Laboratory and On-Field Assessments.  
146 *Ann Biomed Eng* 48:2613–2625. <https://doi.org/10.1007/s10439-020-02647-1>
- 147 14. Baumgartner T a., Chung H (2001) Confidence Limits for Intraclass Reliability  
148 Coefficients. *Meas Phys Educ Exerc Sci* 5:179–188.  
149 [https://doi.org/10.1207/S15327841MPEE0503\\_4](https://doi.org/10.1207/S15327841MPEE0503_4)
- 150 15. Altman DG, Bland JM (1983) Measurement in Medicine: the Analysis of Method  
151 Comparison Studies. *The Statistician* 32:307–317
- 152 16. Datta D (2017) blandr: a Bland-Altman Method Comparison package for R

- 153 17. Giavarina D (2015) Understanding Bland Altman analysis. *Biochem Med (Zagreb)*  
154 25:141–151. <https://doi.org/10.11613/BM.2015.015>

155
